# Supplementary material for: Oxidative Stress Biomarkers and Mitochondrial DNA Copy Number Associated with APOE4 Allele and Cholinesterase Inhibitor Therapy in Patients with Alzheimer’s Disease
Source: MDPI journal article supplement (doi:10.3390/antiox10121971), 2021-12-10
Supplement: s1 [file s1]

Supplementary Table S1. Effects of anti-cholinesterase inhibitor therapy on thiobarbituric acid reactive substances, thiols, mitochondrial DNA copy number of Alzheimer disease patients stratified by different allele type of APOE4.

| Medication group                                                                          | Case number | Non-Medication       | Donepezil            | Rivastigmine          | Galantamine          | Others               | Overall               |
|-------------------------------------------------------------------------------------------|-------------|----------------------|----------------------|-----------------------|----------------------|----------------------|-----------------------|
| Variant                                                                                   | (%)         | Average (case no)    | Average (case no)    | Average (case no)     | Average (case no)    | Average (case no)    | Average (case no)     |
| mtDNA                                                                                     |             |                      |                      |                       |                      |                      |                       |
| No E4 allele ( $\epsilon 2\epsilon 2$ , $\epsilon 2\epsilon 3$ , $\epsilon 3\epsilon 3$ ) | 376 (62.7)  | $2.35 \pm 0.22$ (93) | $2.38 \pm 0.18$ (78) | $2.35 \pm 0.18$ (114) | $2.41 \pm 0.18$ (62) | $2.42 \pm 0.20$ (29) | $2.37 \pm 0.19$ (376) |
| One E4 allele ( $\epsilon 2\epsilon 4$ , $\epsilon 3\epsilon 4$ )                         | 188 (31.3)  | $2.20 \pm 0.19$ (38) | $2.32 \pm 0.24$ (53) | $2.39 \pm 0.25$ (46)  | $2.39 \pm 0.24$ (28) | $2.24 \pm 0.22$ (23) | $2.31 \pm 0.24$ (188) |
| Two E4 allele ( $\epsilon 4\epsilon 4$ )                                                  | 36 (6.0)    | $2.20 \pm 0.20$ (10) | $2.30 \pm 0.17$ (8)  | $2.23 \pm 0.16$ (9)   | $2.16 \pm 0.20$ (4)  | $2.17 \pm 0.11$ (5)  | $2.22 \pm 0.17$ (36)  |
| TBARS                                                                                     |             |                      |                      |                       |                      |                      |                       |
| No E4 allele ( $\epsilon 2\epsilon 2$ , $\epsilon 2\epsilon 3$ , $\epsilon 3\epsilon 3$ ) | 376 (62.7)  | $1.61 \pm 0.66$ (93) | $1.62 \pm 0.69$ (78) | $1.42 \pm 0.67$ (114) | $1.45 \pm 0.67$ (62) | $1.96 \pm 1.08$ (29) | $1.56 \pm 0.72$ (376) |
| One E4 allele ( $\epsilon 2\epsilon 4$ , $\epsilon 3\epsilon 4$ )                         | 188 (31.3)  | $1.82 \pm 0.78$ (38) | $1.69 \pm 0.60$ (53) | $1.66 \pm 0.74$ (46)  | $1.60 \pm 0.75$ (28) | $1.68 \pm 0.85$ (23) | $1.70 \pm 0.73$ (188) |
| Two E4 allele ( $\epsilon 4\epsilon 4$ )                                                  | 36 (6.0)    | $1.86 \pm 0.62$ (10) | $1.54 \pm 0.62$ (8)  | $2.00 \pm 0.66$ (9)   | $1.23 \pm 0.48$ (4)  | $2.65 \pm 0.59$ (5)  | $1.86 \pm 0.71$ (36)  |
| Thiols                                                                                    |             |                      |                      |                       |                      |                      |                       |
| No E4 allele ( $\epsilon 2\epsilon 2$ , $\epsilon 2\epsilon 3$ , $\epsilon 3\epsilon 3$ ) | 376 (62.7)  | $1.61 \pm 0.46$ (93) | $1.61 \pm 0.51$ (78) | $1.69 \pm 0.42$ (114) | $1.57 \pm 0.41$ (62) | $1.64 \pm 0.46$ (29) | $1.63 \pm 0.45$ (376) |
| One E4 allele ( $\epsilon 2\epsilon 4$ , $\epsilon 3\epsilon 4$ )                         | 188 (31.3)  | $1.49 \pm 0.56$ (38) | $1.49 \pm 0.40$ (53) | $1.54 \pm 0.47$ (46)  | $1.61 \pm 0.47$ (28) | $1.70 \pm 0.41$ (23) | $1.55 \pm 0.47$ (188) |
| Two E4 allele ( $\epsilon 4\epsilon 4$ )                                                  | 36 (6.0)    | $1.56 \pm 0.40$ (10) | $1.67 \pm 0.42$ (8)  | $1.33 \pm 0.30$ (9)   | $1.47 \pm 0.72$ (4)  | $1.28 \pm 0.59$ (5)  | $1.48 \pm 0.45$ (36)  |
